# Supplementary material
Source: PubMed Central journal article supplement (PMC3875629)
Supplement: NIHMS481301-supplement-Appendix_1.pdf [file NIHMS481301-supplement-Appendix_1.pdf]

## **Appendix 1.**

Participating clinical research sites in the Genetic Disorders of Mucociliary Clearance

Consortium include:

1. The University of North Carolina at Chapel Hill  
Chapel Hill, NC
2. University of Colorado  
Denver, CO
3. National Institute of Allergy and Infectious Diseases  
Bethesda, MD
4. Washington University in St. Louis  
St. Louis, MO
5. Stanford University  
Palo Alto, CA
6. University of Washington  
Seattle, WA
7. University of Toronto  
Toronto, Ontario
